# Supplementary material
Source: publisher site journal article supplement (https://www.dovepress.com/article/549684)
Supplement: Supplementary file 1 [file 549684%20Supplementary%20Material.docx]

Supplementary Table 1

| Country | documents |
| --- | --- |
| CHINA | 368 |
| UNITED STATES | 144 |
| IRAN | 59 |
| INDIA | 44 |
| ITALY | 42 |
| SOUTH KOREA | 34 |
| ENGLAND | 26 |
| GERMANY | 26 |
| AUSTRALIA | 23 |
| FRANCE | 20 |
| SPAIN | 17 |
| NETHERLANDS | 13 |
| JAPAN | 12 |
| SWITZERLAND | 12 |
| CANADA | 10 |
| PORTUGAL | 10 |
| RUSSIA | 10 |
| TAIWAN | 9 |
| BRAZIL | 8 |
| EGYPT | 8 |
| MALAYSIA | 8 |
| MEXICO | 8 |
| SAUDI ARABIA | 8 |
| SINGAPORE | 8 |
| TURKIYE | 8 |
| AUSTRIA | 7 |
| INDONESIA | 7 |
| SLOVAKIA | 7 |
| SWEDEN | 6 |
| BELGIUM | 5 |
| IRELAND | 5 |
| POLAND | 5 |
| TURKEY | 5 |
| CZECH REPUBLIC | 4 |
| IRAQ | 4 |
| PAKISTAN | 4 |
| ROMANIA | 4 |
| DENMARK | 3 |
| NEW ZEALAND | 3 |
| THAILAND | 3 |
| VIETNAM | 3 |
| GREECE | 2 |
| SCOTLAND | 2 |
| SOUTH AFRICA | 2 |
| WALES | 2 |
| ARGENTINA | 1 |
| BANGLADESH | 1 |
| CHILE | 1 |
| COLOMBIA | 1 |
| ESTONIA | 1 |
| FINLAND | 1 |
| HUNGARY | 1 |
| ISRAEL | 1 |
| JORDAN | 1 |
| KAZAKHSTAN | 1 |
| LITHUANIA | 1 |
| MAURITIUS | 1 |
| MONGOLIA | 1 |
| SERBIA | 1 |
| SLOVENIA | 1 |
| U ARAB EMIRATES | 1 |

Supplementary Table 2

| id | author | documents | citations | total link strength |
| --- | --- | --- | --- | --- |
| 4008 | zhang, y | 21 | 671 | 41 |
| 3995 | zhang, x | 10 | 559 | 33 |
| 1952 | liu, ys | 6 | 409 | 30 |
| 2680 | ravindran, s | 8 | 470 | 28 |
| 1255 | huang, cc | 7 | 449 | 27 |
| 4150 | zhou, ys | 5 | 358 | 26 |
| 3727 | yang, kk | 4 | 33 | 25 |
| 4183 | zhu, y | 4 | 33 | 25 |
| 1923 | liu, sy | 8 | 506 | 24 |
| 913 | gajendrareddy, p | 5 | 207 | 23 |
| 1993 | lu, y | 7 | 212 | 23 |
| 698 | diomede, f | 6 | 635 | 22 |
| 1464 | kang, my | 4 | 200 | 22 |
| 3231 | trubiani, o | 6 | 635 | 22 |
| 539 | cooper, lf | 5 | 269 | 21 |
| 2585 | qian, h | 10 | 167 | 21 |
| 2850 | shao, yz | 3 | 18 | 21 |
| 1396 | jiang, yh | 4 | 40 | 20 |
| 1790 | li, zy | 6 | 67 | 20 |
| 1886 | liu, h | 6 | 208 | 20 |
| 1773 | li, y | 7 | 174 | 19 |
| 2921 | shirazi, s | 4 | 216 | 19 |
| 3352 | wang, h | 6 | 271 | 19 |
| 3427 | wang, y | 10 | 295 | 19 |
| 3440 | wang, yx | 4 | 97 | 19 |
| 3972 | zhang, p | 5 | 376 | 19 |
| 4110 | zhou, cc | 4 | 18 | 19 |
| 466 | chen, zx | 3 | 17 | 18 |
| 3144 | tang, p | 3 | 17 | 18 |
| 4028 | zhang, zy | 3 | 17 | 18 |
| 1728 | li, m | 7 | 223 | 17 |
| 3416 | wang, x | 8 | 365 | 17 |
| 946 | gao, y | 6 | 112 | 16 |
| 1362 | jeyaraman, m | 4 | 46 | 16 |
| 1763 | li, x | 9 | 370 | 16 |
| 2125 | marconi, gd | 4 | 437 | 16 |
| 27 | ahn, bc | 3 | 15 | 15 |
| 921 | gangadaran, p | 3 | 15 | 15 |
| 2161 | mazzon, e | 4 | 520 | 15 |
| 2299 | muthu, s | 3 | 34 | 15 |
| 2646 | rajendran, rl | 3 | 15 | 15 |
| 3429 | wang, yc | 4 | 142 | 15 |
| 3663 | xu, wr | 7 | 151 | 15 |
| 3948 | zhang, j | 6 | 227 | 15 |
| 1285 | huang, y | 7 | 218 | 14 |
| 3364 | wang, j | 8 | 149 | 14 |
| 884 | fonticoli, l | 3 | 344 | 13 |
| 904 | fu, xb | 3 | 100 | 13 |
| 1106 | han, dk | 4 | 79 | 13 |
| 1363 | jeyaraman, n | 3 | 27 | 13 |
| 1535 | kim, jy | 5 | 96 | 13 |
| 2044 | ma, k | 3 | 100 | 13 |
| 3923 | zhang, cp | 3 | 100 | 13 |
| 449 | chen, y | 7 | 150 | 12 |
| 1647 | lee, eh | 4 | 123 | 12 |
| 2555 | pizzicannella, j | 3 | 176 | 12 |
| 2744 | roura, s | 4 | 111 | 12 |
| 3925 | zhang, cr | 3 | 51 | 12 |
| 4163 | zhu, l | 3 | 8 | 12 |
| 201 | bayes-genis, a | 3 | 110 | 11 |
| 1086 | gálvez-montón, c | 3 | 110 | 11 |
| 1312 | ingavle, g | 6 | 72 | 11 |
| 1448 | kale, v | 6 | 72 | 11 |
| 1705 | li, hh | 3 | 204 | 11 |
| 1936 | liu, x | 4 | 32 | 11 |
| 2011 | luo, l | 3 | 271 | 11 |
| 2253 | monguió-tortajada, m | 3 | 110 | 11 |
| 2875 | shen, k | 3 | 207 | 11 |
| 3374 | wang, l | 6 | 69 | 11 |
| 3453 | wang, zx | 5 | 244 | 11 |
| 3580 | xiao, l | 3 | 68 | 11 |
| 4010 | zhang, yf | 7 | 178 | 11 |
| 1067 | guo, sc | 3 | 138 | 10 |
| 1200 | holkar, k | 5 | 50 | 10 |
| 1365 | jha, sk | 3 | 26 | 10 |
| 1702 | li, h | 5 | 116 | 10 |
| 1721 | li, l | 7 | 178 | 10 |
| 1901 | liu, jy | 6 | 193 | 10 |
| 1913 | liu, q | 4 | 42 | 10 |
| 2061 | ma, yp | 3 | 46 | 10 |
| 2856 | sharma, s | 3 | 35 | 10 |
| 3157 | tao, sc | 3 | 138 | 10 |
| 3551 | wu, yh | 3 | 208 | 10 |
| 3664 | xu, x | 4 | 120 | 10 |
| 3710 | yang, c | 3 | 45 | 10 |
| 1521 | kim, bs | 4 | 123 | 9 |
| 1769 | li, xr | 3 | 46 | 9 |
| 1945 | liu, y | 10 | 157 | 9 |
| 1948 | liu, yh | 5 | 38 | 9 |
| 1953 | liu, yt | 3 | 134 | 9 |
| 2568 | prat-vidal, c | 3 | 93 | 9 |
| 3339 | wang, f | 4 | 96 | 9 |
| 3369 | wang, jw | 3 | 38 | 9 |
| 3426 | wang, xy | 4 | 89 | 9 |
| 3544 | wu, xd | 3 | 186 | 9 |
| 3729 | yang, l | 6 | 302 | 9 |
| 3973 | zhang, q | 4 | 24 | 9 |
| 3992 | zhang, wh | 4 | 56 | 9 |
| 412 | chen, jg | 3 | 22 | 8 |
| 1282 | huang, ty | 3 | 22 | 8 |
| 1377 | jiang, hy | 3 | 22 | 8 |
| 1664 | lee, sy | 3 | 16 | 8 |
| 1698 | li, gf | 3 | 69 | 8 |
| 3024 | su, jc | 3 | 69 | 8 |
| 3390 | wang, q | 6 | 23 | 8 |
| 3441 | wang, yy | 4 | 29 | 8 |
| 3535 | wu, pp | 3 | 40 | 8 |
| 3719 | yang, j | 3 | 93 | 8 |
| 4136 | zhou, x | 4 | 23 | 8 |
| 409 | chen, j | 6 | 491 | 7 |
| 420 | chen, l | 7 | 168 | 7 |
| 475 | cheng, j | 4 | 149 | 7 |
| 478 | cheng, k | 5 | 315 | 7 |
| 1071 | guo, wm | 3 | 135 | 7 |
| 1711 | li, j | 8 | 128 | 7 |
| 1738 | li, q | 4 | 201 | 7 |
| 1786 | li, zh | 5 | 126 | 7 |
| 2054 | ma, t | 3 | 313 | 7 |
| 3335 | wang, d | 4 | 47 | 7 |
| 3370 | wang, k | 3 | 96 | 7 |
| 3517 | wu, d | 3 | 158 | 7 |
| 3524 | wu, j | 4 | 94 | 7 |
| 3670 | xu, y | 4 | 60 | 7 |
| 3922 | zhang, c | 4 | 197 | 7 |
| 3956 | zhang, jx | 3 | 170 | 7 |
| 3957 | zhang, jy | 5 | 418 | 7 |
| 71 | altaner, c | 3 | 110 | 6 |
| 72 | altanerova, u | 3 | 110 | 6 |
| 825 | fang, f | 3 | 78 | 6 |
| 883 | fontana, a | 3 | 208 | 6 |
| 1340 | jakubechova, j | 3 | 110 | 6 |
| 1724 | li, ll | 3 | 34 | 6 |
| 1749 | li, s | 6 | 141 | 6 |
| 1805 | liang, yj | 4 | 147 | 6 |
| 2706 | rezakhani, l | 4 | 24 | 6 |
| 3046 | sun, ft | 3 | 37 | 6 |
| 3330 | wang, c | 3 | 132 | 6 |
| 3353 | wang, hc | 3 | 21 | 6 |
| 3700 | yan, j | 3 | 134 | 6 |
| 3864 | yuan, y | 3 | 81 | 6 |
| 3943 | zhang, hj | 3 | 45 | 6 |
| 3951 | zhang, jf | 3 | 63 | 6 |
| 3986 | zhang, t | 3 | 47 | 6 |
| 4014 | zhang, ym | 3 | 37 | 6 |
| 4118 | zhou, j | 4 | 161 | 6 |
| 435 | chen, w | 3 | 69 | 5 |
| 440 | chen, x | 3 | 49 | 5 |
| 932 | gao, jq | 3 | 136 | 5 |
| 1412 | jin, y | 3 | 349 | 5 |
| 1466 | kang, y | 3 | 164 | 5 |
| 1510 | khazaei, m | 3 | 24 | 5 |
| 1857 | lin, y | 4 | 125 | 5 |
| 2492 | park, sy | 3 | 78 | 5 |
| 2636 | rahmati, s | 3 | 24 | 5 |
| 3051 | sun, jm | 3 | 64 | 5 |
| 3550 | wu, y | 4 | 218 | 5 |
| 3605 | xie, y | 3 | 219 | 5 |
| 3753 | yang, z | 4 | 233 | 5 |
| 3845 | yu, y | 3 | 370 | 5 |
| 3967 | zhang, m | 4 | 61 | 5 |
| 3993 | zhang, wj | 5 | 329 | 5 |
| 4005 | zhang, xx | 4 | 727 | 5 |
| 167 | bai, yx | 3 | 82 | 4 |
| 1212 | hosseinzadeh, s | 4 | 112 | 4 |
| 1633 | le, ad | 4 | 179 | 4 |
| 1654 | lee, j | 3 | 32 | 4 |
| 1673 | lei, q | 3 | 191 | 4 |
| 1710 | li, hy | 3 | 297 | 4 |
| 3418 | wang, xh | 4 | 182 | 4 |
| 3443 | wang, z | 3 | 34 | 4 |
| 3903 | zeng, h | 3 | 16 | 4 |
| 3970 | zhang, n | 4 | 212 | 4 |
| 3977 | zhang, qz | 4 | 179 | 4 |
| 4006 | zhang, xy | 3 | 13 | 4 |
| 4013 | zhang, yl | 3 | 253 | 4 |
| 4021 | zhang, yy | 3 | 35 | 4 |
| 4023 | zhang, z | 4 | 164 | 4 |
| 4068 | zhao, y | 3 | 12 | 4 |
| 4144 | zhou, y | 5 | 348 | 4 |
| 418 | chen, jy | 3 | 35 | 3 |
| 1264 | huang, jh | 3 | 151 | 3 |
| 1383 | jiang, sj | 3 | 40 | 3 |
| 1873 | liu, c | 3 | 61 | 3 |
| 2873 | shen, j | 3 | 120 | 3 |
| 2966 | soleimani, m | 4 | 178 | 3 |
| 3197 | tian, wd | 3 | 31 | 3 |
| 3447 | wang, zj | 3 | 74 | 3 |
| 3585 | xiao, y | 3 | 77 | 3 |
| 3639 | xu, j | 4 | 208 | 3 |
| 3966 | zhang, ly | 3 | 60 | 3 |
| 4007 | zhang, xz | 3 | 24 | 3 |
| 4192 | zhuang, y | 3 | 92 | 3 |
| 448 | chen, xy | 4 | 57 | 2 |
| 1778 | li, yq | 4 | 105 | 2 |
| 2179 | menasché, p | 4 | 109 | 2 |
| 2487 | park, jh | 4 | 113 | 2 |
| 2552 | pishavar, e | 4 | 149 | 2 |
| 2697 | ren, x | 3 | 84 | 2 |
| 4064 | zhao, x | 3 | 146 | 2 |
| 4145 | zhou, yc | 3 | 45 | 2 |
| 576 | cui, xl | 3 | 81 | 1 |
| 1005 | golchin, a | 3 | 93 | 1 |
| 1136 | hare, jm | 3 | 181 | 1 |
| 1141 | hashemi, m | 4 | 83 | 1 |
| 1916 | liu, r | 3 | 30 | 1 |
| 2427 | orlando, g | 3 | 45 | 1 |
| 3893 | zavan, b | 3 | 47 | 1 |
| 537 | conti, m | 3 | 42 | 0 |
| 581 | cunnane, em | 3 | 163 | 0 |
| 1536 | kim, k | 4 | 159 | 0 |
| 2339 | ng, mh | 3 | 191 | 0 |
| 2378 | nooshabadi, vt | 6 | 208 | 0 |
| 3286 | velot, é | 3 | 93 | 0 |
| 3325 | wang, aj | 5 | 173 | 0 |

Supplementary Table 3

| id | country | documents | citations | total link strength |
| --- | --- | --- | --- | --- |
| 57 | united states | 144 | 5801 | 128 |
| 9 | china | 377 | 11935 | 73 |
| 26 | italy | 42 | 1711 | 44 |
| 20 | india | 44 | 813 | 39 |
| 22 | iran | 59 | 1794 | 38 |
| 17 | germany | 26 | 937 | 36 |
| 56 | united kingdom | 29 | 566 | 32 |
| 2 | australia | 23 | 1218 | 24 |
| 16 | france | 20 | 654 | 21 |
| 48 | south korea | 34 | 657 | 17 |
| 42 | saudi arabia | 8 | 86 | 16 |
| 41 | russia | 10 | 205 | 14 |
| 23 | iraq | 4 | 114 | 13 |
| 27 | japan | 12 | 238 | 13 |
| 21 | indonesia | 7 | 146 | 12 |
| 6 | brazil | 8 | 206 | 11 |
| 33 | mexico | 8 | 117 | 11 |
| 35 | netherlands | 13 | 1104 | 11 |
| 51 | switzerland | 12 | 320 | 11 |
| 13 | egypt | 8 | 168 | 10 |
| 44 | singapore | 8 | 645 | 10 |
| 49 | spain | 17 | 364 | 10 |
| 54 | turkiye | 8 | 31 | 10 |
| 7 | canada | 9 | 708 | 9 |
| 5 | belgium | 5 | 168 | 8 |
| 50 | sweden | 6 | 537 | 8 |
| 45 | slovakia | 7 | 151 | 6 |
| 3 | austria | 7 | 618 | 5 |
| 24 | ireland | 5 | 448 | 5 |
| 31 | malaysia | 8 | 228 | 5 |
| 37 | pakistan | 4 | 96 | 5 |
| 39 | portugal | 10 | 447 | 5 |
| 36 | new zealand | 3 | 81 | 4 |
| 38 | poland | 5 | 89 | 4 |
| 11 | czech republic | 4 | 506 | 3 |
| 12 | denmark | 3 | 70 | 3 |
| 40 | romania | 4 | 61 | 3 |
| 58 | vietnam | 3 | 35 | 3 |
| 52 | thailand | 3 | 48 | 2 |
| 53 | turkey | 5 | 104 | 2 |

Supplementary Table 4

| id | organization | documents | citations | total link strength |
| --- | --- | --- | --- | --- |
| 801 | shanghai jiao tong univ | 35 | 1371 | 51 |
| 839 | sichuan univ | 29 | 861 | 33 |
| 1141 | univ tehran med sci | 17 | 547 | 28 |
| 783 | shahid beheshti univ med sci | 15 | 348 | 22 |
| 877 | sun yat sen univ | 13 | 259 | 21 |
| 156 | chinese acad med sci | 5 | 122 | 20 |
| 332 | harvard med sch | 9 | 217 | 19 |
| 1227 | zhejiang univ | 20 | 744 | 19 |
| 896 | tarbiat modares univ | 9 | 451 | 18 |
| 1140 | univ tehran | 8 | 35 | 18 |
| 539 | mashhad univ med sci | 10 | 356 | 17 |
| 663 | peking univ | 18 | 854 | 17 |
| 158 | chinese acad sci | 7 | 264 | 16 |
| 273 | fudan univ | 10 | 221 | 16 |
| 294 | germans trias & pujol univ hosp | 4 | 111 | 16 |
| 401 | inst salud carlos iii | 4 | 111 | 16 |
| 1105 | univ pittsburgh | 5 | 119 | 16 |
| 87 | beijing key res lab skin injury repair & regenerat | 3 | 100 | 15 |
| 407 | iran univ med sci | 7 | 125 | 15 |
| 421 | islamic azad univ | 9 | 63 | 15 |
| 676 | peoples liberat army gen hosp | 4 | 29 | 15 |
| 684 | pla key lab tissue repair & regenerat med | 3 | 100 | 15 |
| 812 | shanghai univ | 8 | 124 | 15 |
| 852 | southern med univ | 11 | 306 | 15 |
| 869 | stanford univ | 5 | 185 | 15 |
| 119 | carnegie mellon univ | 3 | 84 | 14 |
| 129 | cent south univ | 11 | 249 | 14 |
| 344 | hlth sci res inst germans trias & pujol igtp | 3 | 110 | 14 |
| 936 | uab | 3 | 110 | 14 |
| 1160 | univ vic cent univ catalonia uvic ucc | 3 | 110 | 14 |
| 124 | cedars sinai med ctr | 3 | 131 | 13 |
| 159 | chinese peoples liberat army gen hosp | 9 | 399 | 13 |
| 267 | fourth mil med univ | 18 | 583 | 13 |
| 776 | semnan univ med sci | 8 | 147 | 13 |
| 1071 | univ michigan | 4 | 183 | 13 |
| 151 | china med univ | 16 | 460 | 12 |
| 232 | emory univ | 3 | 94 | 12 |
| 291 | georgia inst technol | 3 | 94 | 12 |
| 396 | inst invest biomed bellvitge idibell | 3 | 93 | 12 |
| 578 | nanjing med univ | 13 | 443 | 12 |
| 584 | nankai univ | 6 | 236 | 12 |
| 1039 | univ illinois | 10 | 526 | 12 |
| 502 | kyungpook natl univ | 6 | 76 | 11 |
| 1102 | univ penn | 6 | 272 | 11 |
| 1187 | wake forest sch med | 4 | 89 | 11 |
| 1203 | xi an jiao tong univ | 10 | 1066 | 11 |
| 1230 | zhengzhou univ | 10 | 377 | 11 |
| 450 | johns hopkins univ | 3 | 174 | 10 |
| 642 | ohio state univ | 7 | 391 | 10 |
| 823 | sharda univ | 4 | 46 | 10 |
| 832 | shenzhen univ | 8 | 240 | 10 |
| 835 | shiraz univ med sci | 4 | 310 | 10 |
| 931 | tongji univ | 13 | 219 | 10 |
| 36 | all india inst med sci | 5 | 90 | 9 |
| 386 | indian stem cell study grp iscsg assoc | 3 | 27 | 9 |
| 444 | jinan univ | 5 | 150 | 9 |
| 462 | karpagam acad higher educ | 3 | 90 | 9 |
| 810 | shanghai res inst stomatol | 4 | 119 | 9 |
| 853 | southwest jiaotong univ | 4 | 116 | 9 |
| 993 | univ chinese acad sci | 7 | 190 | 9 |
| 1016 | univ g dannunzio | 7 | 645 | 9 |
| 357 | huazhong univ sci & technol | 16 | 614 | 8 |
| 468 | kermanshah univ med sci | 6 | 162 | 8 |
| 594 | natl clin res ctr oral dis | 3 | 109 | 8 |
| 620 | naval med univ | 5 | 240 | 8 |
| 1191 | wenzhou med univ | 5 | 717 | 8 |
| 1234 | zunyi med univ | 14 | 215 | 8 |
| 203 | dalian med univ | 6 | 136 | 7 |
| 328 | hangzhou med coll | 6 | 129 | 7 |
| 784 | shahid sadoughi univ med sci | 3 | 19 | 7 |
| 816 | shanghai zhongye hosp | 3 | 65 | 7 |
| 890 | tabriz univ med sci | 5 | 340 | 7 |
| 921 | tianjin med univ | 4 | 45 | 7 |
| 933 | tsinghua univ | 6 | 118 | 7 |
| 1095 | univ otago | 3 | 81 | 7 |
| 1173 | uttaranchal univ | 3 | 17 | 7 |
| 1222 | zhejiang chinese med univ | 5 | 64 | 7 |
| 51 | asia univ | 3 | 12 | 6 |
| 134 | cha univ | 6 | 113 | 6 |
| 161 | chinese univ hong kong | 4 | 59 | 6 |
| 188 | comenius univ | 5 | 129 | 6 |
| 227 | east china univ sci & technol | 3 | 40 | 6 |
| 315 | guangzhou med univ | 8 | 511 | 6 |
| 409 | irccs ctr neurolesi bonino pulejo | 4 | 520 | 6 |
| 710 | qingdao univ | 5 | 189 | 6 |
| 840 | slovak acad sci | 4 | 121 | 6 |
| 850 | southeast univ | 7 | 180 | 6 |
| 864 | st elisabeth canc inst | 3 | 110 | 6 |
| 949 | univ alabama birmingham | 3 | 235 | 6 |
| 1027 | univ hong kong | 5 | 261 | 6 |
| 1098 | univ paris | 5 | 175 | 6 |
| 1104 | univ pisa | 3 | 42 | 6 |
| 1188 | wake forest univ | 4 | 44 | 6 |
| 15 | acecr | 4 | 75 | 5 |
| 117 | capital med univ | 9 | 166 | 5 |
| 446 | jining med univ | 4 | 52 | 5 |
| 458 | kaohsiung med univ | 3 | 24 | 5 |
| 493 | korea univ | 5 | 146 | 5 |
| 735 | royal coll surgeons ireland | 3 | 86 | 5 |
| 793 | shandong univ | 8 | 316 | 5 |
| 802 | shanghai jiao tong univ affiliated peoples hosp 6 | 4 | 237 | 5 |
| 843 | soochow univ | 7 | 233 | 5 |
| 862 | ss annunziata hosp | 3 | 376 | 5 |
| 981 | univ calif los angeles | 6 | 116 | 5 |
| 1007 | univ exeter | 3 | 46 | 5 |
| 1116 | univ roma tor vergata | 3 | 104 | 5 |
| 1223 | zhejiang healthfuture biomed co ltd | 3 | 35 | 5 |
| 77 | beihang univ | 3 | 14 | 4 |
| 265 | florida state univ | 6 | 312 | 4 |
| 356 | houston methodist res inst | 4 | 163 | 4 |
| 441 | jiangsu univ | 11 | 232 | 4 |
| 541 | mayo clin | 3 | 149 | 4 |
| 580 | nanjing tech univ | 3 | 78 | 4 |
| 617 | natl univ singapore | 6 | 561 | 4 |
| 632 | north carolina state univ | 4 | 310 | 4 |
| 786 | shahrekord univ med sci | 4 | 42 | 4 |
| 789 | shandong first med univ | 3 | 226 | 4 |
| 820 | shanxi med univ | 5 | 74 | 4 |
| 932 | trinity coll dublin | 3 | 267 | 4 |
| 983 | univ calif san diego | 3 | 79 | 4 |
| 1012 | univ ferrara | 4 | 103 | 4 |
| 1070 | univ miami | 4 | 236 | 4 |
| 1097 | univ padua | 4 | 56 | 4 |
| 1103 | univ piemonte orientale | 3 | 29 | 4 |
| 1127 | univ sci & technol china | 3 | 78 | 4 |
| 1137 | univ sydney | 3 | 206 | 4 |
| 1138 | univ technol sydney | 3 | 46 | 4 |
| 155 | china pharmaceut univ | 3 | 21 | 3 |
| 166 | chongqing univ | 4 | 94 | 3 |
| 379 | imperial coll london | 3 | 177 | 3 |
| 496 | kunming med univ | 3 | 189 | 3 |
| 543 | mazandaran univ med sci | 3 | 5 | 3 |
| 581 | nanjing univ | 3 | 70 | 3 |
| 690 | politecn torino | 3 | 41 | 3 |
| 838 | shriners hosp children northern calif | 3 | 105 | 3 |
| 847 | south china univ technol | 3 | 79 | 3 |
| 905 | tecnol monterrey | 4 | 79 | 3 |
| 979 | univ calif davis | 4 | 152 | 3 |
| 1080 | univ n carolina | 3 | 259 | 3 |
| 1217 | yonsei univ | 3 | 60 | 3 |
| 157 | chinese acad med sci & peking union med coll | 6 | 241 | 2 |
| 371 | icahn sch med mt sinai | 3 | 250 | 2 |
| 460 | karolinska inst | 3 | 143 | 2 |
| 507 | lanzhou univ | 5 | 136 | 2 |
| 516 | lomonosov moscow state univ | 3 | 25 | 2 |
| 698 | prince sattam bin abdulaziz univ | 3 | 13 | 2 |
| 586 | nantong univ | 3 | 48 | 1 |
| 925 | tianjin univ tradit chinese med | 3 | 150 | 1 |
| 978 | univ calgary | 3 | 269 | 1 |
| 1077 | univ montpellier | 3 | 32 | 1 |
| 1111 | univ queensland | 3 | 31 | 1 |
| 1200 | wuhan univ | 7 | 106 | 1 |
| 44 | ankara univ | 3 | 26 | 0 |
| 567 | monash univ | 3 | 535 | 0 |
| 878 | sungkyunkwan univ | 4 | 93 | 0 |
| 889 | symbiosis int deemed univ | 6 | 72 | 0 |
| 892 | taipei med univ | 3 | 36 | 0 |
| 914 | third mil med univ | 3 | 31 | 0 |
| 1046 | univ kebangsaan malaysia | 4 | 194 | 0 |
| 1054 | univ lisbon | 3 | 110 | 0 |
| 1057 | univ lorraine | 4 | 165 | 0 |
| 1063 | univ maryland | 4 | 280 | 0 |
| 1096 | univ padjadjaran | 3 | 22 | 0 |
| 1166 | univ zurich | 4 | 76 | 0 |

Supplementary Table 5

| id | source | documents | citations | total link strength |
| --- | --- | --- | --- | --- |
| 157 | international journal of molecular sciences | 38 | 1518 | 10464 |
| 123 | frontiers in bioengineering and biotechnology | 37 | 537 | 16018 |
| 264 | stem cell research & therapy | 21 | 1207 | 5037 |
| 186 | journal of nanobiotechnology | 20 | 705 | 5856 |
| 125 | frontiers in cell and developmental biology | 19 | 610 | 10636 |
| 244 | pharmaceutics | 18 | 355 | 9313 |
| 80 | cells | 18 | 1022 | 8325 |
| 5 | acta biomaterialia | 15 | 647 | 6289 |
| 267 | stem cells international | 15 | 1021 | 6271 |
| 34 | bioactive materials | 15 | 806 | 4665 |
| 274 | tissue engineering part b-reviews | 14 | 495 | 4687 |
| 269 | theranostics | 13 | 1643 | 6444 |
| 9 | advanced healthcare materials | 13 | 450 | 5949 |
| 50 | biomedicine & pharmacotherapy | 12 | 235 | 4604 |
| 47 | biomaterials science | 9 | 321 | 4606 |
| 158 | international journal of nanomedicine | 9 | 419 | 2805 |
| 99 | current stem cell research & therapy | 9 | 144 | 1968 |
| 4 | acs nano | 9 | 187 | 1344 |
| 174 | journal of controlled release | 8 | 248 | 4406 |
| 44 | biomaterials | 8 | 266 | 2523 |
| 2 | acs applied materials & interfaces | 8 | 624 | 2365 |
| 252 | regenerative therapy | 8 | 33 | 1441 |
| 271 | tissue & cell | 7 | 66 | 2537 |
| 51 | biomedicines | 7 | 110 | 1963 |
| 265 | stem cell reviews and reports | 7 | 61 | 1059 |
| 92 | composites part b-engineering | 7 | 74 | 789 |
| 262 | small | 6 | 247 | 2474 |
| 124 | frontiers in cardiovascular medicine | 6 | 150 | 2194 |
| 49 | biomedical materials | 6 | 101 | 1499 |
| 177 | journal of drug delivery science and technology | 6 | 38 | 1465 |
| 14 | advanced science | 6 | 70 | 936 |
| 70 | cancers | 5 | 132 | 3093 |
| 130 | frontiers in immunology | 5 | 411 | 2256 |
| 85 | chemical engineering journal | 5 | 70 | 1005 |
| 208 | materials today bio | 5 | 126 | 688 |
| 152 | international journal of biological macromolecules | 5 | 16 | 286 |
| 8 | advanced functional materials | 4 | 359 | 2599 |
| 55 | biomolecules | 4 | 103 | 2586 |
| 7 | advanced drug delivery reviews | 4 | 396 | 2433 |
| 181 | journal of materials chemistry b | 4 | 49 | 2162 |
| 136 | frontiers in pharmacology | 4 | 247 | 2030 |
| 135 | frontiers in oncology | 4 | 59 | 1584 |
| 111 | european cells & materials | 4 | 53 | 777 |
| 284 | world journal of stem cells | 4 | 43 | 730 |
| 171 | journal of cellular physiology | 4 | 158 | 682 |
| 273 | tissue engineering part a | 4 | 124 | 645 |
| 137 | frontiers in physiology | 3 | 94 | 1914 |
| 168 | journal of biomedical science | 3 | 47 | 1854 |
| 222 | nano convergence | 3 | 10 | 1736 |
| 198 | life sciences | 3 | 151 | 1535 |
| 199 | life-basel | 3 | 26 | 1367 |
| 272 | tissue engineering and regenerative medicine | 3 | 163 | 1097 |
| 39 | bioengineering-basel | 3 | 22 | 1074 |
| 179 | journal of extracellular vesicles | 3 | 120 | 1065 |
| 35 | biocell | 3 | 11 | 993 |
| 169 | journal of cellular and molecular medicine | 3 | 383 | 901 |
| 3 | acs biomaterials science & engineering | 3 | 80 | 785 |
| 194 | journal of tissue engineering | 3 | 88 | 771 |
| 280 | view | 3 | 49 | 757 |
| 203 | materials | 3 | 25 | 706 |
| 10 | advanced materials | 3 | 165 | 656 |
| 247 | polymers | 3 | 37 | 647 |
| 18 | aging-us | 3 | 267 | 535 |
| 189 | journal of personalized medicine | 3 | 12 | 487 |
| 89 | circulation research | 3 | 345 | 432 |
| 166 | journal of biomedical materials research part a | 3 | 29 | 200 |
